# Supplementary material for: Novel Mutation in CRYBB3 Causing Pediatric Cataract and Microphthalmia
Source: MDPI journal article supplement (doi:10.3390/genes12071069), 2021-07-13
Supplement: s1 [file s1]

## Supplementary Materials

**Table S1.** Previously reported mutations in *CRYBB3*.

| Nucleotide Change | Amino Acid Change | Type of Mutation | Inheritance Pattern | Family Origin | Cataract Phenotype | Other Phenotype                  | Reference                                                 |
|-------------------|-------------------|------------------|---------------------|---------------|--------------------|----------------------------------|-----------------------------------------------------------|
| c.75+1 G>A        |                   | Splice site      | AD                  | China         | Zonular            | N/A                              | Yu (2021), Mol Genet Genomic Med 9:1617.                  |
| c.224G>A          | p.Arg75His        | Missense         | AD                  | Denmark       | N/A                | Microcornea                      | Hansen (2009), Investig Ophthalmol Vis Sci, 50:3291.      |
| c.226G>A          | p.Gly76Arg        | Missense         | Sporadic            | China         | Cortical           | N/A                              | Dan Li (2016), Mol Vis, 22:589.                           |
| c.314G>A          | p.Arg105Gln       | Missense         | Sporadic            | China         | Total              | N/A                              | Dan Li (2016), Mol Vis, 22:589.                           |
| c.466G>A          | p.Gly156Arg       | Missense         | Sporadic            | China         | Nuclear            | N/A                              | Dan Li (2016), Mol Vis, 22:589.                           |
| c.466G>A          | p.Gly156Arg       | Missense         | AD                  | Pakistan      | Nuclear            | N/A                              | Jackson (2020), Am J Med Genet C Semin Med Genet 184:578. |
| c.466G>A          | p.Gly156Arg       | Missense         | AD                  | Turkey        | Nuclear            | Microphthalmia, aphakic glaucoma | Sekeroglu (2020), Mol Syndromol 11:302.                   |
| c.493G>C          | p.Gly165Cys       | Missense         | AR                  | Pakistan      | Nuclear            | N/A                              | Riazuddin et al., 2005.                                   |

|          |                 |          |    |           |                                                        |                                 |                                 |
|----------|-----------------|----------|----|-----------|--------------------------------------------------------|---------------------------------|---------------------------------|
| c.493G>C | p.Gly165Cys     | Missense | AR | Australia | N/A                                                    | N/A                             | Ma (2016), Human Mutat 37:371.  |
| c.581T>A | p.Val194Glu     | Missense | AD | Italy     | Posterior polar, nuclear, anterior polar plus cortical | Glaucoma, incomplete penetrance | Reis (2013), Hum Genet 132:761. |
| c.634T>C | p.*212Argext*40 | Missense | AD | Australia | N/A                                                    | N/A                             | Ma (2016), Human Mutat 37: 371. |

(AD – autosomal dominant; AR – autosomal recessive; N/A – non applicable).

#### Supplementary Material

**Table S2.** List of 658 genes related to cataract available at Human Phenotype Ontology.

---

ABCA12  
ABCA2  
ABCA4  
ABHD12  
ABHD5  
ACTB  
ADA2  
ADAMTS10  
ADAMTS18  
ADAMTSL4  
ADGRV1  
ADNP  
AFF4  
AGA  
AGBL5

---

---

AGK  
AHI1  
AHR  
AIPL1  
AIRE  
AKT1  
ALDH18A1  
ALDH6A1  
ALDOB  
ALG2  
ALG8  
ALMS1  
ALX1  
ALX3  
AMER1  
AMMECR1  
ANAPC1  
ANO10  
AP1S1  
APC  
APC2  
ARHGAP31  
ARHGEF18  
ARID1A  
ARID1B  
ARID2  
ARL2BP  
ARL3

---

---

ARL6  
ARSG  
ARSL  
ATAD3A  
ATOH7  
ATP6V1A  
ATP6V1B2  
ATP8A2  
B3GALNT2  
B3GLCT  
B4GALNT1  
B4GAT1  
B9D1  
B9D2  
BAP1  
BBIP1  
BBS1  
BBS2  
BCOR  
BCS1L  
BEST1  
BFSP1  
BFSP2  
BMP4  
BRCA1  
BRCA2  
BRF1  
BRIP1

---

---

BTNL2  
BUB1  
BUB1B  
C4A  
C8orf37  
CA4  
CA8  
CASK  
CAV1  
CBS  
CC2D2A  
CCDC28B  
CDH11  
CDH23  
CDHR1  
CENPF  
CEP164  
CEP290  
CEP55  
CEP57  
CEP78  
CERKL  
CFAP410  
CHMP4B  
CHRD1  
CIB2  
CLN3  
CLPB

---

---

CLRN1  
CNBP  
CNGA1  
CNGB1  
CNGB3  
COG4  
COL11A1  
COL18A1  
COL2A1  
COL4A1  
COL4A3  
COL4A4  
COL4A5  
COL7A1  
COL9A1  
COL9A2  
COL9A3  
COMT  
COX1  
COX2  
COX3  
COX7B  
CPAMD8  
CPT2  
CRB1  
CREBBP  
CRPPA  
CRX

---

---

CRYAA  
CRYAB  
CRYBA1  
CRYBA2  
CRYBA4  
CRYBB1  
CRYBB2  
CRYBB3  
CRYGB  
CRYGC  
CRYGD  
CRYGS  
CSPP1  
CTC1  
CTDP1  
CYP1B1  
CYP27A1  
CYP7B1  
CYTB  
DACT1  
DAG1  
DDB2  
DGUOK  
DHCR7  
DHDDS  
DHX38  
DKC1  
DLL4

---

---

DMPK  
DNM1L  
DNMT1  
DOCK6  
DPAGT1  
DPF2  
DSG4  
DYNC2H1  
DYNC2I1  
DYNC2I2  
EBP  
EED  
ELN  
ELP4  
ENTPD1  
EOGT  
EP300  
EPG5  
EPHA2  
ERCC1  
ERCC2  
ERCC3  
ERCC4  
ERCC5  
ERCC6  
ERCC8  
ESCO2  
ESPN

---



---

ETFA  
ETFB  
ETFDH  
EYS  
FAM111A  
FAM111B  
FAM126A  
FAM161A  
FANCA  
FANCB  
FANCC  
FANCD2  
FANCE  
FANCF  
FANCG  
FANCI  
FANCL  
FANCM  
FAR1  
FAS  
FBN1  
FBXL4  
FGF3  
FGF5  
FH  
FIBP  
FIG4  
FKRP

---

---

FKTN  
FLI1  
FLNA  
FLNB  
FLVCR1  
FOXC1  
FOXC2  
FOXE3  
FSCN2  
FTL  
FYCO1  
FZD4  
GABRD  
GALK1  
GALM  
GALT  
GATA1  
GBA2  
GCNT2  
GDF6  
GDNF  
GEMIN4  
GFER  
GJA1  
GJA3  
GJA8  
GJB3  
GJB4

---

---

GJB6  
GLA  
GMPPB  
GNA11  
GNAQ  
GNAS  
GNPAT  
GP1BB  
GSN  
GSR  
GTF2E2  
GTF2H5  
GTPBP2  
GUCA1B  
GUCY2D  
HARS1  
HBB  
HCCS  
HDAC8  
HGSNAT  
HLA-A  
HLA-B  
HLA-DRB1  
HMX1  
HNRNPA1  
HNRNPA2B1  
HNRNPDL  
HSF4

---

---

HSPG2  
HTRA2  
IARS2  
IDH3B  
IFT140  
IFT172  
IFT80  
IKBKKG  
IL10  
IL23R  
IMPDH1  
IMPG2  
INPP5E  
INPP5K  
INTS1  
INVS  
IQCB1  
ITM2B  
ITPA  
JAG1  
JAM3  
KANSL1  
KCNA4  
KCNH1  
KCNJ13  
KCNN3  
KCTD1  
KDSR

---

---

KIAA1109  
KIAA1549  
KIF11  
KIF1B  
KIZ  
KLHL7  
KLLN  
KMT2A  
KRT25  
KRT71  
KRT74  
KRT81  
KRT83  
KRT86  
LAMB1  
LARGE1  
LCA5  
LEMD2  
LIG4  
LIM2  
LIPH  
LMNA  
LMX1B  
LONP1  
LOXL1  
LPAR6  
LRAT  
LRP2

---

---

LRP4  
LRP5  
LSS  
LTBP2  
MAB21L2  
MAD2L2  
MAF  
MAFA  
MAK  
MAN2B1  
MAP2K2  
MAX  
MED25  
MEFV  
MERTK  
MFRP  
MIP  
MIPEP  
MIR140  
MIR184  
MIR204  
MKS1  
MMP1  
MORC2  
MPLKIP  
MSMO1  
MTAP  
MVK

---

---

MYH9  
MYMK  
MYO7A  
MYSM1  
NAA10  
NACC1  
NAGA  
ND1  
ND5  
ND6  
NDP  
NDUFB11  
NEK2  
NEK9  
NEU1  
NF2  
NHP2  
NHS  
NIPBL  
NMNAT1  
NOD2  
NOP10  
NOTCH1  
NOTCH2  
NPHP1  
NPHP3  
NPHP4  
NPM1

---

---

NR2E3  
NRL  
NSD1  
NSUN2  
NUP188  
OAT  
OCLN  
OCRL  
OFD1  
OPA1  
OPA3  
OTX2  
P3H2  
PAH  
PALB2  
PARN  
PAX2  
PAX6  
PCARE  
PCDH15  
PCYT1A  
PDE6A  
PDE6B  
PDE6G  
PDZD7  
PEX1  
PEX10  
PEX11B

---



---

PEX12  
PEX13  
PEX14  
PEX16  
PEX19  
PEX2  
PEX26  
PEX3  
PEX5  
PEX6  
PEX7  
PHF6  
PHGDH  
PHYH  
PIGY  
PIK3C2A  
PIK3CA  
PIK3R1  
PITX2  
PITX3  
PLCG2  
PLK4  
PLOD3  
PMM2  
PNPLA6  
PNPT1  
POLG  
POLG2

---

---

POLR1C  
POLR1D  
POLR3A  
POMGNT1  
POMGNT2  
POMK  
POMT1  
POMT2  
PQBP1  
PRCD  
PRDM16  
PROM1  
PRPF3  
PRPF31  
PRPF4  
PRPF6  
PRPF8  
PRPH2  
PRUNE1  
PSAT1  
PTCH1  
PTCH2  
PTEN  
PTH  
PTH1R  
PTPN22  
PXDN  
RAB18

---

---

RAB3GAP1  
RAB3GAP2  
RAD21  
RAD51  
RAD51C  
RALGAPA1  
RB1  
RBP3  
RBPJ  
RD3  
RDH11  
RDH12  
RECQL4  
REEP6  
RERE  
RET  
RFWD3  
RGR  
RHO  
RHOA  
RIC1  
RLBP1  
RNF113A  
RNF13  
ROM1  
RP1  
RP2  
RP9

---

---

RPE65  
RPGR  
RPGRIP1  
RPGRIP1L  
RPL11  
RPL15  
RPL18  
RPL26  
RPL27  
RPL35  
RPL35A  
RPL5  
RPS10  
RPS15A  
RPS17  
RPS19  
RPS24  
RPS26  
RPS27  
RPS28  
RPS29  
RPS6KA3  
RPS7  
RRM2B  
RS1  
RSPO2  
RTEL1  
RXYLT1

---

---

SAG  
SALL1  
SALL2  
SALL4  
SC5D  
SCAPER  
SDCCAG8  
SDHB  
SDHC  
SDHD  
SEC23A  
SEC23B  
SEC31A  
SEMA4A  
SETD2  
SETD5  
SF3B1  
SHROOM4  
SIL1  
SIPA1L3  
SIX6  
SKI  
SLC16A12  
SLC25A13  
SLC25A4  
SLC2A1  
SLC33A1  
SLC40A1

---

---

SLC4A4  
SLC7A14  
SLX4  
SMAD3  
SMAD4  
SMARCA4  
SMARCB1  
SMARCC2  
SMARCD1  
SMARCE1  
SMC1A  
SMC3  
SMCHD1  
SNRNP200  
SOX11  
SOX4  
SPATA7  
SPRTN  
SRD5A3  
STAT4  
STX16  
SUFU  
SUMF1  
TARS1  
TBC1D20  
TBC1D24  
TBR1  
TBX1

---

---

TCOF1  
TCTN2  
TDRD7  
TELO2  
TERC  
TERT  
TFAP2A  
TGFB1  
TGM3  
TNF2  
TKFC  
TKT  
TMEM107  
TMEM127  
TMEM216  
TMEM231  
TMEM67  
TMEM70  
TMTC3  
TONSL  
TOPORS]  
TRAF3IP1  
TRAPPC11  
TRIM44  
TRIP13  
TRNC  
TRNF  
TRNK

---

---

TRNL1  
TRNQ  
TRNS1  
TRNS2  
TRNV  
TRNW  
TRPV4  
TSR2  
TTC8  
TUB  
TUBB2B  
TUBG1  
TUBGCP6  
TULP1  
TWNK  
UBA5  
UBE2A  
UBE2T  
UNC45B  
USB1  
USH1C  
USH1G  
USH2A  
USP45  
USP8  
USP9X  
VAC14  
VCAN

---



---

VCP  
VHL  
VIM  
VLDLR  
VSX2  
WDPCP  
WDR19  
WDR35  
WDR73  
WDR81  
WFS1  
WHRN  
WNT3  
WRAP53  
WRN  
WT1  
XPA  
XPC  
XRCC2  
XRCC4  
XYLT2  
YAP1  
ZBTB20  
ZEB2  
ZNF335  
ZNF408  
ZNF513

---
